# Supplementary material for: A highly selective chemosensor for naked-eye sensing of nanomolar Cu(ii) in an aqueous medium
Source: Royal Society of Chemistry journal article supplement (doi:10.1039/c5ra12407g), 2015-01-01
Supplement: c5ra12407g1.pdf [file c5ra12407g1.pdf]

## Supporting Information

### A highly selective chemosensor for naked-eye sensing of nanomolar Cu(II) in an aqueous medium

Yao Qian,<sup>a</sup> Li Cao,<sup>a</sup> Chunman Jia,<sup>\*ab</sup> Peter Osei Boamah,<sup>c</sup> Qiuyun Yang,<sup>a</sup> Chunling Liu,<sup>a</sup> Yan Huang<sup>d</sup> and Qi Zhang<sup>\*ad</sup>

<sup>a</sup> Hainan Provincial Key Lab of Fine Chemistry, Hainan University, Haikou, Hainan 570228, China. Email: zhangqi@hainu.edu.cn; Tel: +86-0898-66257271

<sup>b</sup> Key Study Center of the National Ministry of Education for Tropical Resources Utilization, Hainan University, Haikou, Hainan 570228, China

<sup>c</sup> Department of Ecological Agriculture, Bolgatanga Polytechnic, Bolgatanga, Ghana

<sup>d</sup> School of Chemistry and Chemical Engineering, Jiangsu University, Zhenjiang, Jiangsu 212013, China

| Entry      | Contents                                                                                     | Pages |
|------------|----------------------------------------------------------------------------------------------|-------|
| Fig. S1-S3 | <sup>1</sup> H NMR, <sup>13</sup> C NMR, HRMS data of compound <b>2</b>                      | S2    |
| Fig. S4-S6 | <sup>1</sup> H NMR, <sup>13</sup> C NMR, HRMS data of compound <b>L</b>                      | S3    |
| Fig. S7    | Equilibration time                                                                           | S5    |
| Fig. S8    | Linear plot of the change in absorbance of the system vs. [Cu <sup>2+</sup> ]                | S6    |
| Fig. S9    | ESI mass spectrum of <b>L-Cu<sup>2+</sup></b> complex                                        | S7    |
| Fig. S10   | Benesi-Hildebrand analysis                                                                   | S7    |
| Fig. S11   | Titration curves of <b>L-Cu<sup>2+</sup></b> complex upon addition of Hg <sup>2+</sup>       | S8    |
| Fig. S12   | The response of <b>L-Cu<sup>2+</sup></b> with Hg <sup>2+</sup> from different concentrations | S8    |
| Fig. S13   | The response of <b>L</b> with Cu <sup>2+</sup> from different copper salts                   | S9    |
| Fig. S14   | <sup>1</sup> H NMR titration experiment                                                      | S9    |
| Fig. S15   | Reversibility experiment                                                                     | S10   |

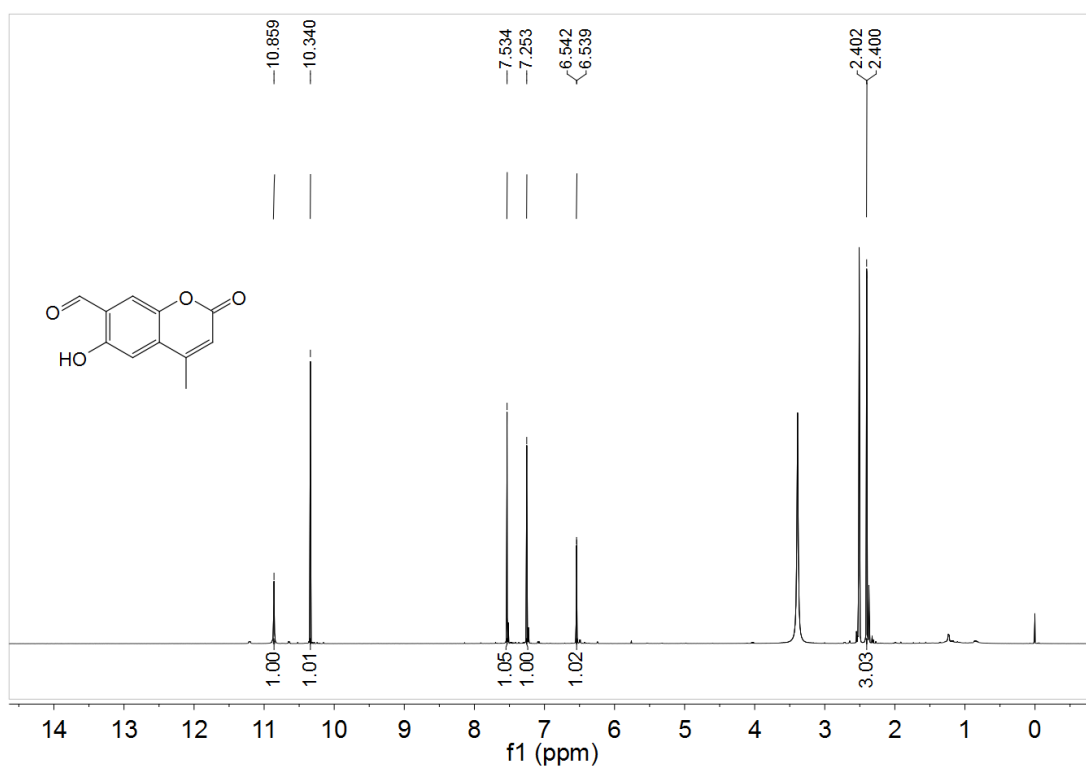

**Fig. S1**  $^1\text{H}$  NMR (400 MHz) spectrum of **2** in  $(\text{CD}_3)_2\text{SO}$ .

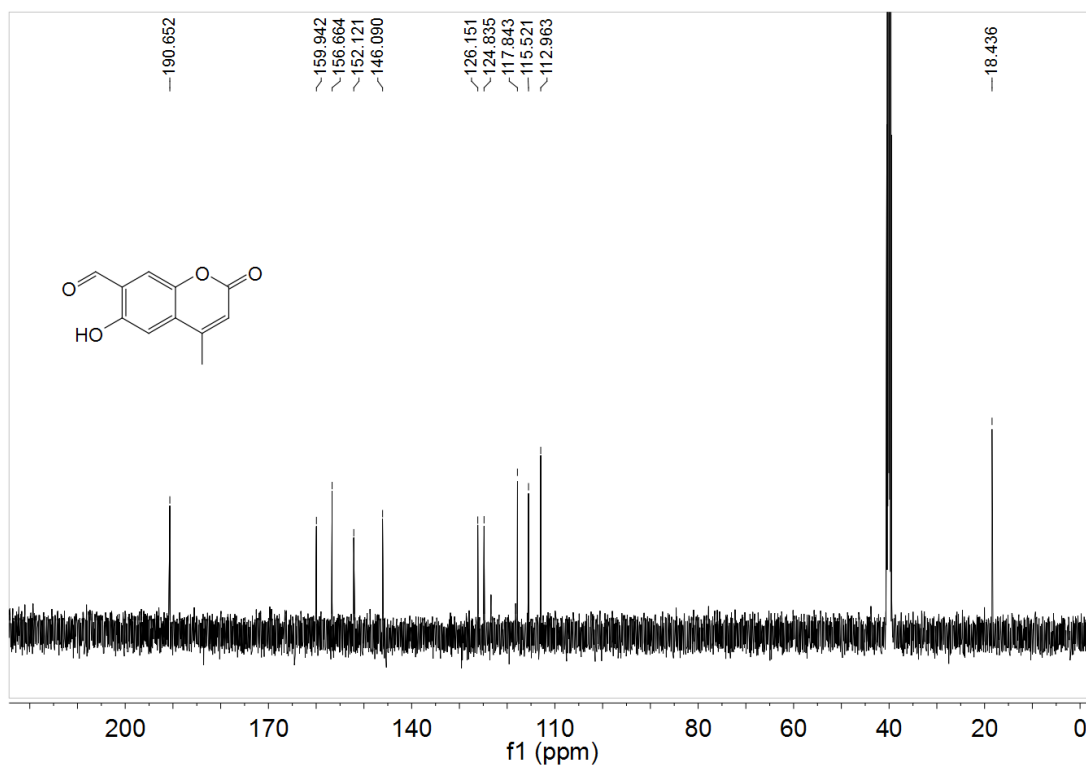

**Fig. S2**  $^{13}\text{C}$  NMR (101 MHz) spectrum of **2** in  $(\text{CD}_3)_2\text{SO}$ .

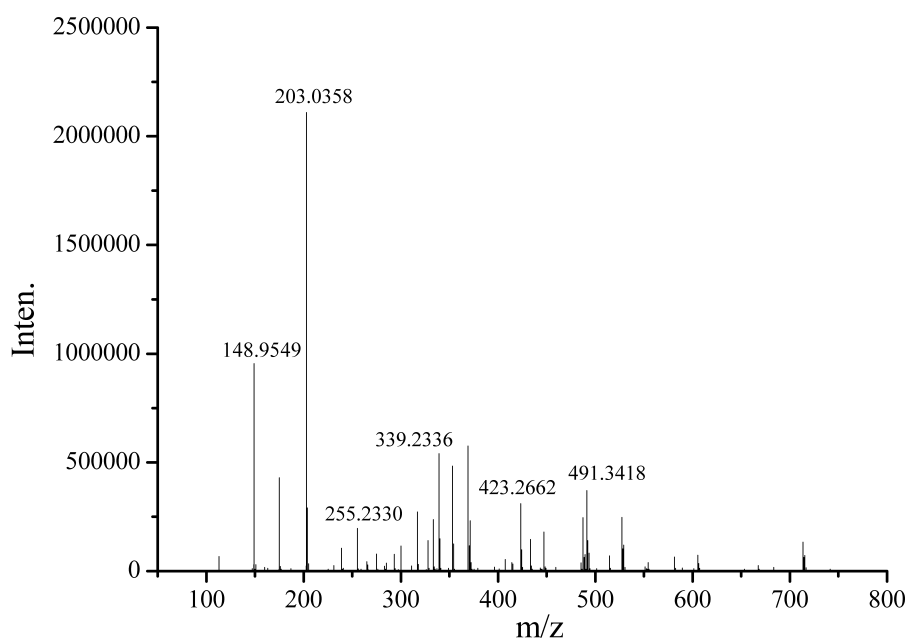

**Fig. S3** ESI mass spectrum of **2**.

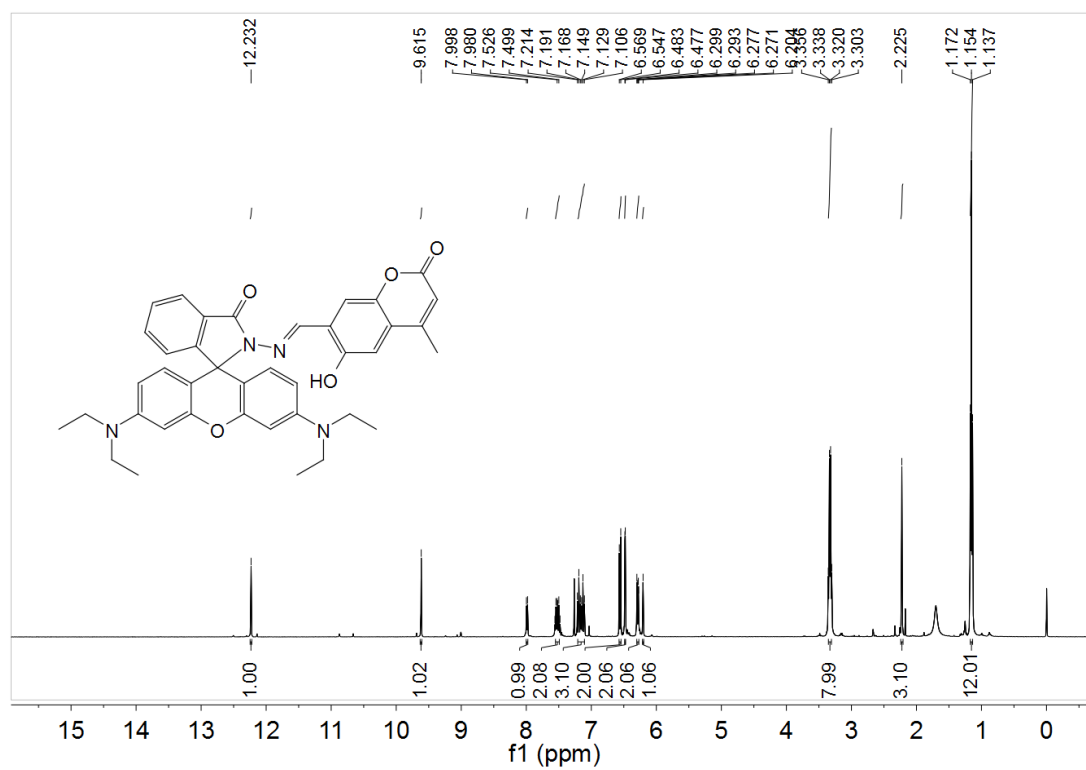

**Fig. S4**  $^1\text{H}$  NMR (400 MHz) spectrum of **L** in  $\text{CDCl}_3$ .

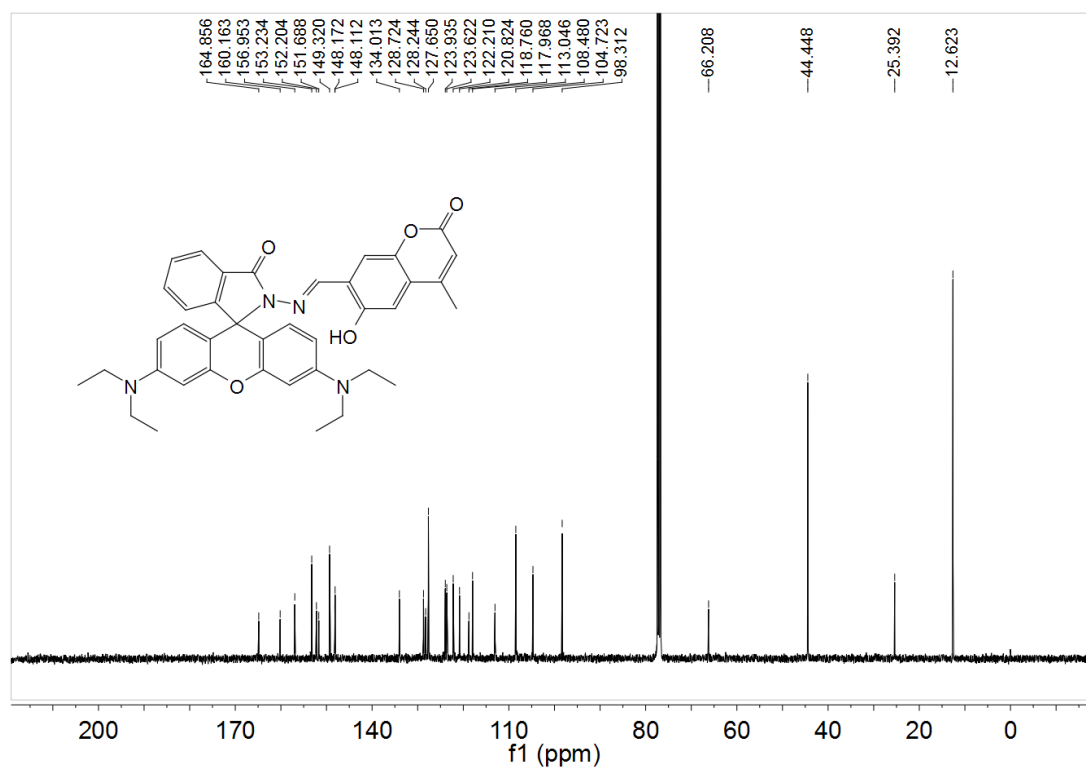

**Fig. S5**  $^{13}\text{C}$  NMR (101 MHz) spectrum of **L** in  $\text{CDCl}_3$ .

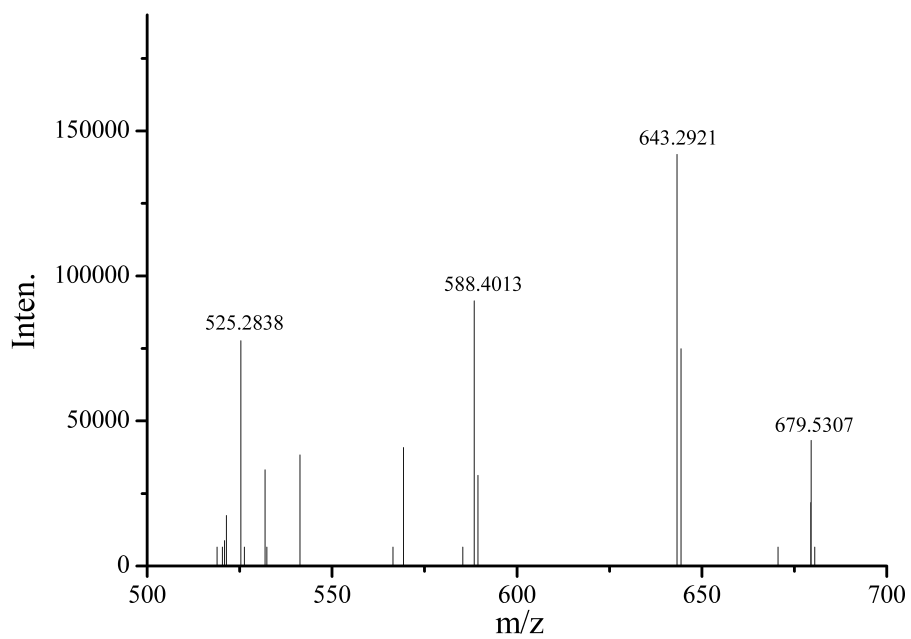

**Fig. S6** ESI mass spectrum of **L**.

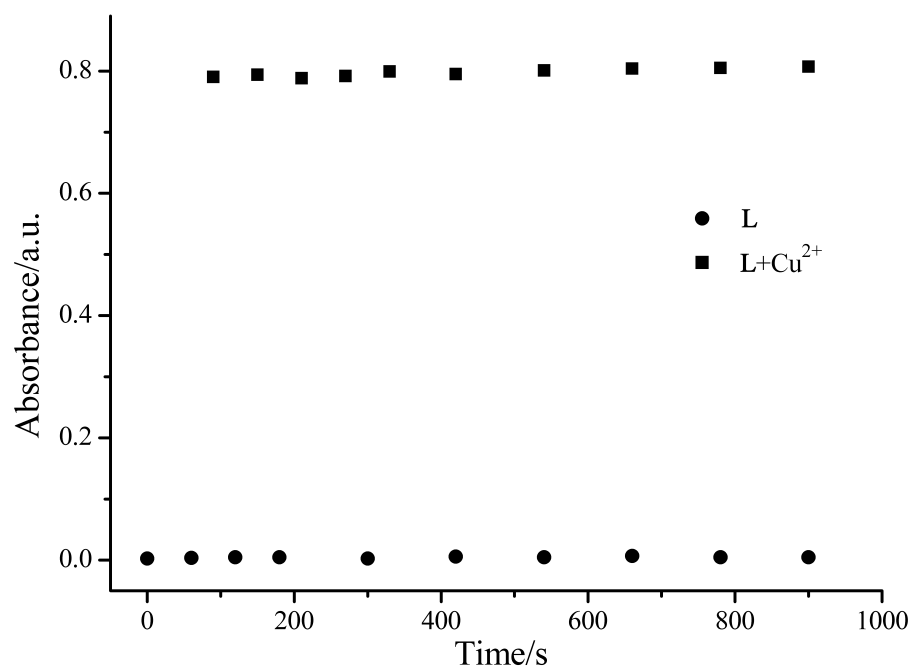

**Fig. S7** Time-dependent absorption intensities change of **L** (10  $\mu\text{M}$ , in DMSO) and **L** (10  $\mu\text{M}$ , in DMSO) with  $\text{CuCl}_2 \cdot 2\text{H}_2\text{O}$  (10  $\mu\text{M}$ , in  $\text{H}_2\text{O}$ ) in DMSO/ $\text{H}_2\text{O}$  (1:1, v/v) solution at room temperature.

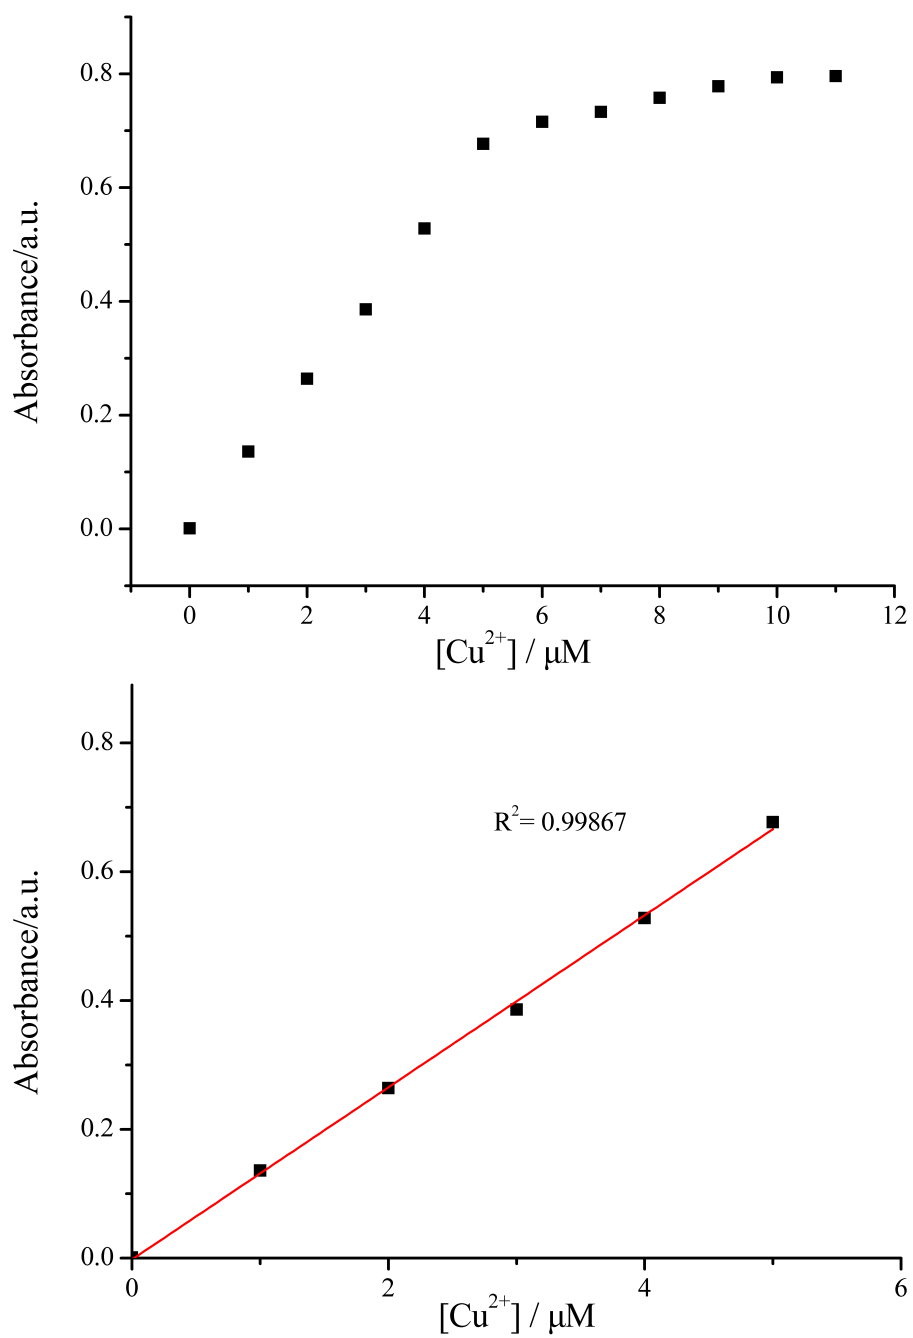

**Fig. S8** (top) Absorbance of **L** at 562 nm vs.  $[Cu^{2+}]$ . (bottom) Linear plot of the change in absorbance of the system vs.  $[Cu^{2+}]$ .

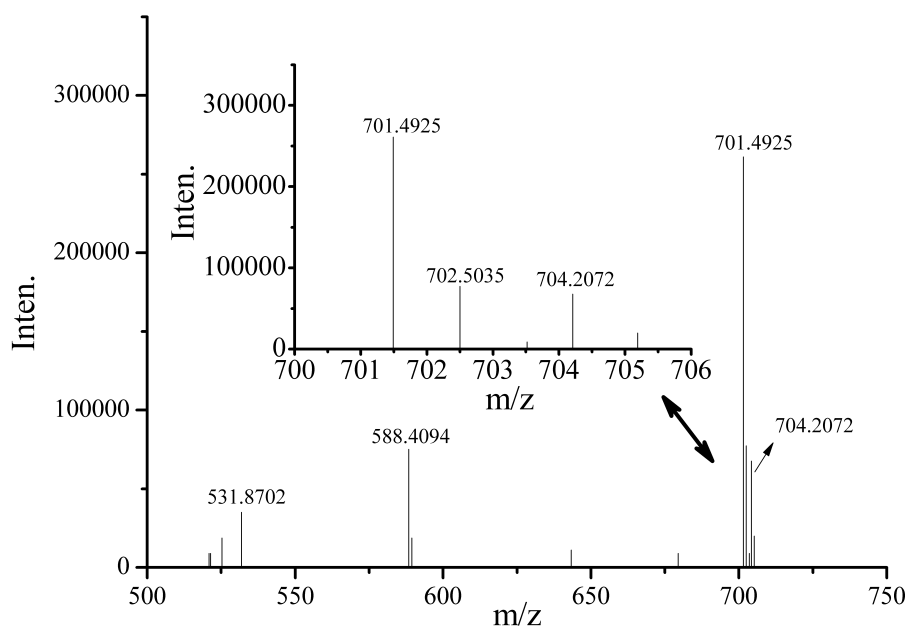

**Fig. S9** ESI mass spectrum of L-Cu<sup>2+</sup> complex.

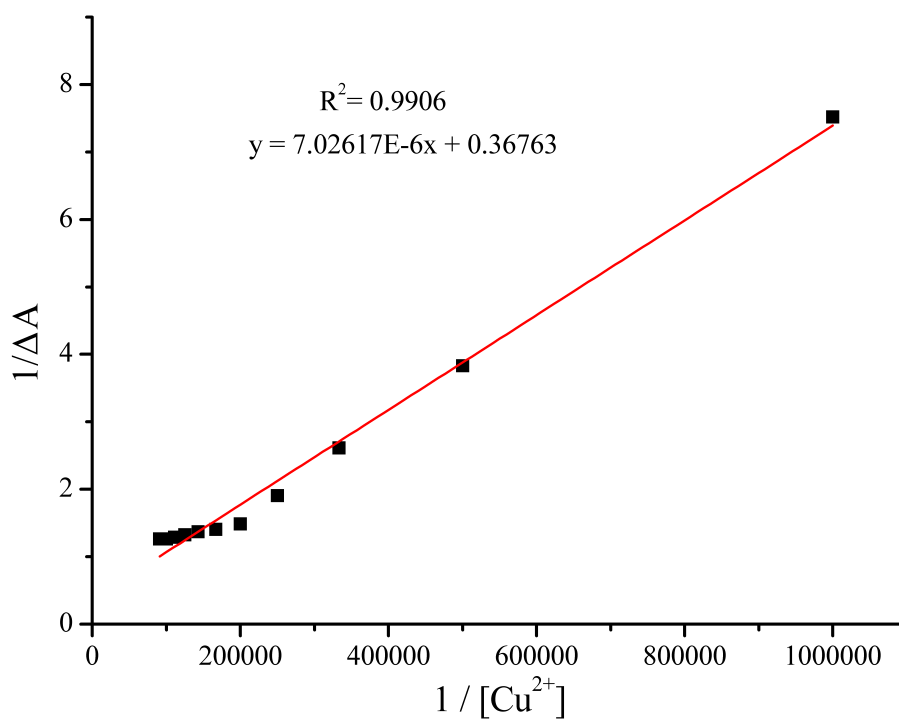

**Fig. S10** Benesi-Hildebrand analysis of L at different Cu<sup>2+</sup> concentrations. The absorbance was monitored at 562 nm.

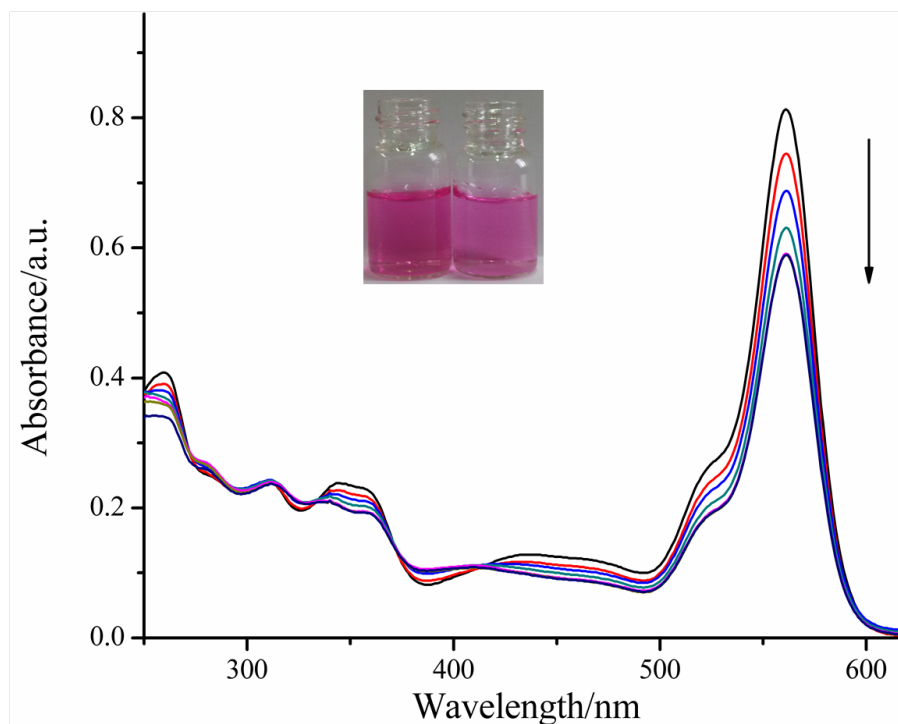

**Fig. S11** Titration curves of  $L-Cu^{2+}$  complex ( $10 \mu M$ ,  $DMSO/H_2O = 1:1$ , v/v) upon addition of  $HgCl_2$  ( $0\sim 60 \mu M$ , in  $H_2O$ ). Inset shows the color change of the solution before (left) and after (right) the addition of  $Hg^{2+}$ .

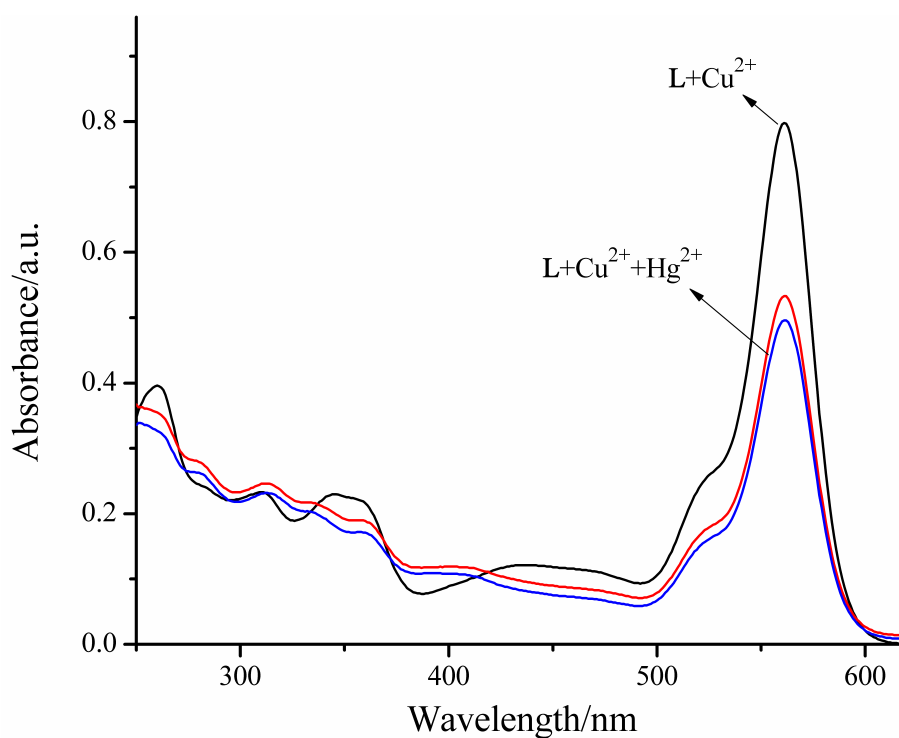

**Fig. S12** Absorption spectra of  $L-Cu^{2+}$  complex ( $10 \mu M$ ,  $DMSO/H_2O = 1:1$ , v/v) upon the addition of  $HgCl_2$  ( $50 \mu M$ ,  $100 \mu M$ , in  $H_2O$ , respectively).



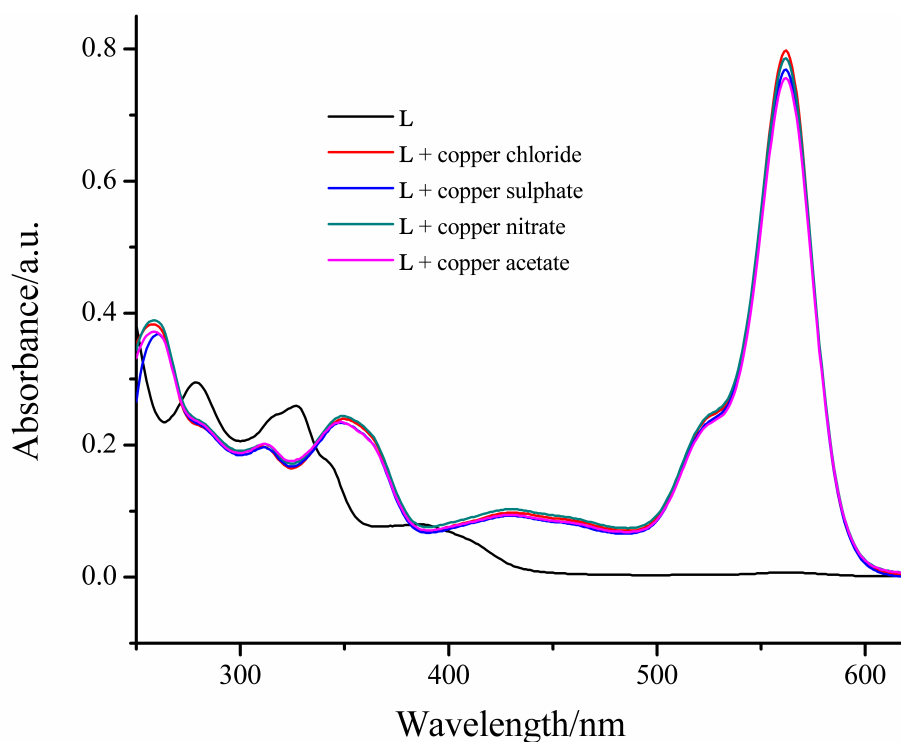

**Fig. S13** Absorption spectra of **L** (10  $\mu\text{M}$ , in DMSO) recorded after the addition of different copper salts (10  $\mu\text{M}$ , in  $\text{H}_2\text{O}$ , respectively) in DMSO/ $\text{H}_2\text{O}$  (1:1, v/v) solution.

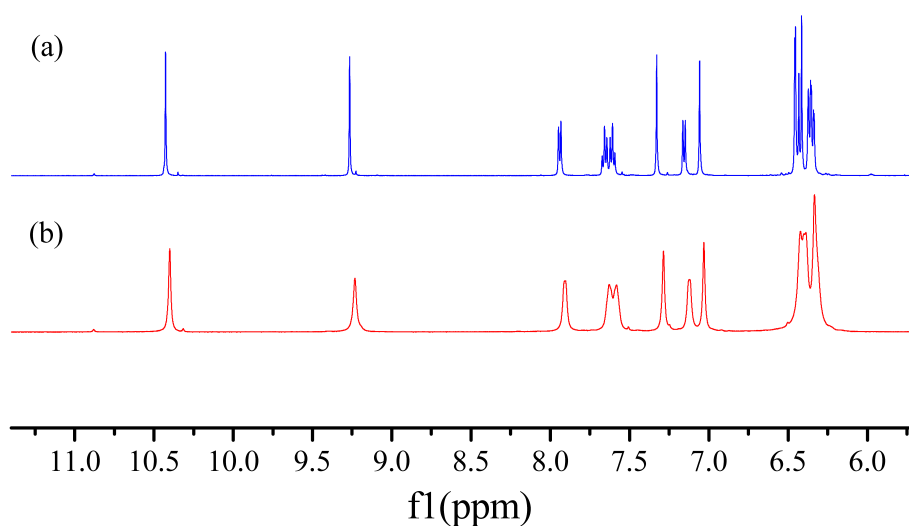

**Fig. S14** Partial  $^1\text{H}$  NMR spectra of **L** (10 mg) before (a) and after (b) addition of 1 equiv. of  $\text{CuCl}_2 \cdot 2\text{H}_2\text{O}$  in  $\text{DMSO}-d_6$ .

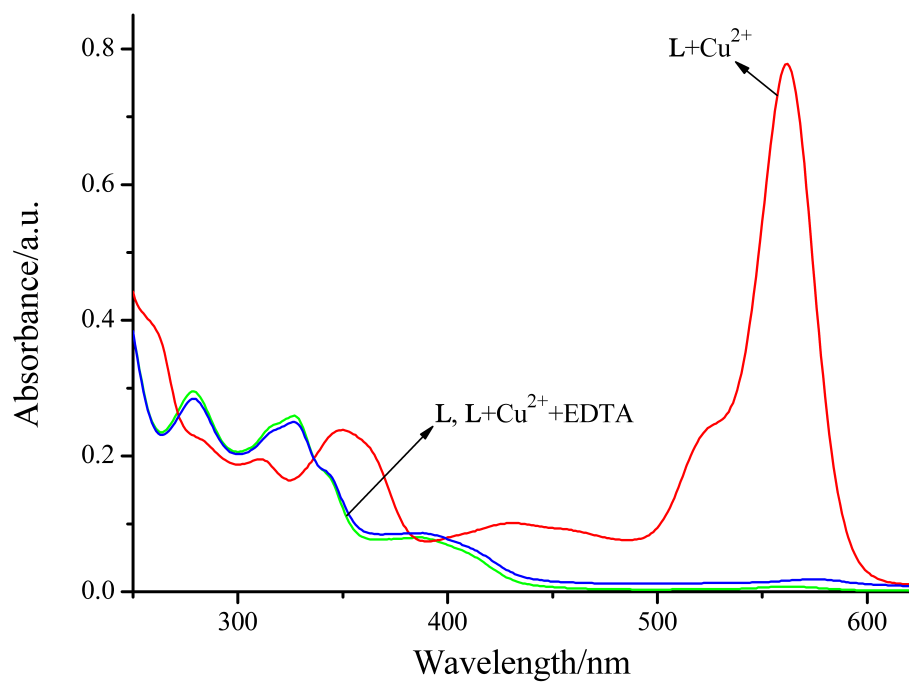

**Fig. S15** Absorption spectra of **L** (10  $\mu\text{M}$ ) and **L-Cu<sup>2+</sup>** complex (10  $\mu\text{M}$ ) upon the addition of 1.5 equiv. of EDTA-2Na.
